# Supplementary material for: In silico-screened cationic dipeptides from scallop with synergistic gelation effect on ι-carrageenan
Source: Royal Society of Chemistry journal article supplement (doi:10.1039/d1fo00570g), 2021-01-01
Supplement: d1fo00570g1.pdf [file d1fo00570g1.pdf]

**Table S1 All dipeptides screened from scallop (*Patinopecten yessoensis*) male gonad hydrolysates by *in silico* approach**

| Dipeptides | Molecular weight | Iso-electric point | Net charge at pH 7 |
|------------|------------------|--------------------|--------------------|
| WK         | 332.40           | 10.01              | 1                  |
| MR         | 305.40           | 10.59              | 1                  |
| QR         | 302.33           | 10.55              | 1                  |
| FK         | 293.37           | 9.88               | 1                  |
| IR         | 287.36           | 10.85              | 1                  |
| LR         | 287.36           | 10.84              | 1                  |
| MK         | 277.38           | 9.88               | 1                  |
| TR         | 275.31           | 10.53              | 1                  |
| VR         | 273.34           | 10.81              | 1                  |
| SR         | 261.28           | 10.57              | 1                  |
| NK         | 260.29           | 9.7                | 1                  |
| LK         | 259.35           | 10.12              | 1                  |
| CK         | 249.33           | 9.13               | 0.9                |
| TK         | 247.29           | 9.82               | 1                  |
| VK         | 245.32           | 10.1               | 1                  |
| SK         | 233.27           | 9.86               | 1                  |
| GR         | 231.25           | 10.84              | 1                  |
| AK         | 217.27           | 10.19              | 1                  |
| GK         | 203.24           | 10.12              | 1                  |
